# Supplementary material for: Ketogenic diet attenuates cognitive dysfunctions induced by hypoglycemia via inhibiting endoplasmic reticulum stress-dependent pathways
Source: Royal Society of Chemistry journal article supplement (doi:10.1039/d3fo04007k), 2023-12-21
Supplement: d3fo04007k17.xlsx [file d3fo04007k17.xlsx]

## Sheet: Fig1
Biomarker_names	Log_value	Groups	LDA_values	p_value
k__Bacteria.p__Actinobacteria.c__Coriobacteriia.o__Coriobacteriales.f__Coriobacteriaceae.g__Paraeggerthella	3.53303	SD+HG	3.92095	0.000482262357512
k__Bacteria.p__Firmicutes.c__Bacilli.o__Lactobacillales.f__Lactobacillaceae.g__Lactobacillus	5.66197	SD+HG	5.28224	0.00115204509814
k__Bacteria.p__Proteobacteria.c__Deltaproteobacteria.o__Desulfovibrionales.f__Desulfovibrionaceae.g__Desulfovibrio	4.61192	KD+HG	4.00727	0.0493661947519
k__Bacteria.p__Firmicutes.c__Clostridia.o__Clostridiales.f__Lachnospiraceae.g__Dorea	4.7336	KD+HG	4.23147	0.0126111440993
k__Bacteria.p__Proteobacteria.c__Epsilonproteobacteria.o__Campylobacterales.f__Helicobacteraceae.g__Helicobacter	5.12775	KD+HG	4.68571	0.0412500165939
k__Bacteria.p__Firmicutes.c__Clostridia.o__Clostridiales.f__Clostridiaceae.g__CandidatusArthromitus	4.0185	SD+HG	3.71547	0.0233422020129
k__Bacteria.p__Proteobacteria.c__Alphaproteobacteria.o__Sphingomonadales.f__Sphingomonadaceae.g__Sphingomonas	3.3613	SD+HG	3.8192	0.0265310377506
k__Bacteria.p__Bacteroidetes.c__Bacteroidia.o__Bacteroidales.f__Rikenellaceae.g__Rikenella	3.64029	SD+HG	3.74548	0.00393419699078
k__Bacteria.p__Firmicutes.c__Bacilli.o__Lactobacillales.f__Enterococcaceae.g__Enterococcus	2.64398	SD+HG	4.00038	0.00553981029242
k__Bacteria.p__Firmicutes.c__Clostridia.o__Clostridiales.f__Ruminococcaceae.g__Clostridium	4.18406	SD+HG	3.86558	0.00319709944793
k__Bacteria.p__Bacteroidetes.c__Bacteroidia.o__Bacteroidales.f___Paraprevotellaceae_.g___Prevotella_	4.61066	SD+HG	4.33537	0.00272464474982
k__Bacteria.p__Firmicutes.c__Clostridia.o__Clostridiales.f__Ruminococcaceae.g__Butyricicoccus	2.97429	SD+HG	4.27457	0.0290124825115
k__Bacteria.p__Firmicutes.c__Bacilli.o__Lactobacillales.f__Aerococcaceae.g__Atopostipes	3.0775	SD+HG	3.52162	0.0464220952173
k__Bacteria.p__Proteobacteria.c__Betaproteobacteria.o__Burkholderiales.f__Comamonadaceae.g__Comamonas	3.29956	SD+HG	3.73068	0.0475556564796
k__Bacteria.p__Firmicutes.c__Erysipelotrichi.o__Erysipelotrichales.f__Erysipelotrichaceae.g__Anaerorhabdus	3.96895	SD+HG	3.64806	0.00149887333715

## Sheet: Fig2-body weight
		1d	3d	5d	7d	9d	11d	13d	15d	16d	17d	18d
	Control	29	32.9	37.3	39	39.9	41.5	42.2	38.2	43.8	43.6	44.8
		24	27.4	30	32.1	32.8	34.6	34.8	31.8	35.5	36.2	37.2
		29.3	32	36.1	37.3	38.5	40.3	41.2	38	41.8	44.2	44.8
		25	28.2	31	32.3	33.3	33.9	34.7	31.7	36.6	36.6	32
		26.7	30.6	33.1	35.1	35.7	37.8	38.6	35	39.5	39.3	37.2
		24.7	28.6	28.5	30.1	29.3	30.5	30.8	27.7	31.6	32.5	32.6
		23.1	29	29	30.8	30.7	33.1	33	29.8	34.6	35.5	35.5
		24	27.9	28.3	29.9	29.3	29.8	31	27.8	31.9	32.9	32.2
		25.3	30	30.2	32.6	32.5	33.9	33.8	30	35.4	35.6	35.4
		28.1	33.8	35.4	34.3	37.8	40	40.5	37.6	43.2	41.9	44.7
		29.7	34.9	37.8	38.6	40.6	42.4	44	40.5	45.7	45.7	46.4
		30	34.2	35.8	36.5	38.8	39.4	41.3	38	43.7	43.2	44.6
		27.8	33.4	35.2	36.2	36.9	38.2	39	35.8	40.8	41.8	41.4
		25.7	31.3	33.4	34.2	36.1	37.4	38.5	35.7	40.6	40.1	40.6
		31.9	36.4	37.7	39.6	40.8	40.7	43.6	40	43.8	44.4	44.7
		23.5	26.7	28	29.7	31.5	33.5	34.3	31.2	34.5	35.2	36
		24.7	25.5	27.2	29.3	31.4	33.4	36.5	33.2	36.6	37.9	38.5
		26.9	28.3	29.9	31.5	33.7	35.2	36.7	33.6	36.5	36.8	38.2
		24.1	25.8	27.2	28.9	31.1	32.3	33.9	30.5	34.1	34.5	36.4
		27.3	30.5	32.4	33.8	35.1	37.2	38.6	35.1	38	39.7	40.2
	SD+HG	26.2	30.9	31.9	32.3	34.1	34.2	34.8	31.8	34.9	35.9	35.8
		26.1	30.3	32.3	33.4	34.2	35.4	36.1	32	37.2	37.2	37.4
		23.1	27.5	29.2	30.5	31.3	32.3	32	29	32.8	33.7	34.6
		22.2	26.4	28.3	29.5	30.5	31.8	32.6	29.1	33.2	34.2	34.6
		24.2	30.6	32.2	32.3	29.3	33.8	35.5	31.7	35.1	36.2	36.6
		22.6	28.9	30.7	31	29.7	33.4	34.7	31.6	34.4	36.2	36.8
		23	28.4	31.9	32.5	33.1	34.8	35.1	33	35.3	36.4	36.6
		23.7	29.6	33.9	35	34.8	36	37.2	35.4	38.5	39.3	39.5
		24.2	29.5	31.3	32.3	34	35	35.4	32.5	34.3	36.3	36.9
		23.4	28.1	30.1	31.3	32.6	33.1	32.7	31.1	32.2	34.6	35.7
		22.3	26.3	27.4	29	29.4	30.3	30.5	27.9	30	32	32.6
		23.7	30.2	32.1	33.9	34.7	36.5	36.1	32.8	35.2	38.2	38.7
		23.5	28.5	20.4	32.2	33.8	35.4	35.9	33.4	35.7	37.5	38.7
		21.6	26.4	29.3	30.9	34	36.8	38.5	35.1	38	39.3	40
		30	34.3	35.4	37	38.3	39.5	40.9	37.2	40.1	40.8	41.2
		33	36.4	38.4	40.1	41.3	43.1	44.2	40.3	43.9	44.2	44.6
		31	36.1	37.6	39.4	40.5	41.9	42.5	39.5	42.4	42.9	43
		29.4	32.9	35.4	36	37.4	38.7	39.4	36.4	39.1	39.8	40.2
		31.2	36.9	38.3	39.3	40	41.1	41.8	38.9	41.1	41.5	41.5
		24.6	26.3	27.3	30.1	33.1	35.2	36.4	33.4	36.7	38.4	41.2
	KD+HG	26.3	27.7	28.9	29.9	31.1	31.6	34.2	33.4	29	29	31.2
		24.8	26.4	28.5	28.8	21.9	29.7	32.3	29.7	32.8	33.7	32.5
		26.6	26.6	28.3	28.1	29.1	30.4	34.3	32.9	35.4	36.4	35.5
		25	24.9	25.5	26.7	26.7	28.7	30.3	27.2	29.2	30.6	31
		25.4	26.3	26.4	28.2	27.2	29.8	31.1	29.1	32.3	33.5	33.3
		25.8	25.9	27	28.6	28.5	30.4	32	30	32.9	34.5	34.1
		25.6	26.3	27.5	28.3	27.5	31	29.8	28.3	30.7	32.3	32.1
		26.7	26.2	27.4	29	28.4	31.2	31.5	29.5	32	33.8	33.9
		27.2	29.3	29.6	30.1	31.6	32.9	32	30.8	35.4	36.1	36.5
		25.9	26.4	25.6	27.4	27.1	30.4	31.8	30.9	33.3	34.4	34.7
		26.3	27	27.5	28.7	29.3	32.1	33.5	32.7	34.5	35.6	35.2
		24.4	27.4	26.7	28.5	26.4	30.9	33.2	29.6	34	34.4	35
		25	27.4	27.8	28.2	28.7	31.7	33.1	30.1	33.1	33.8	33.7
		25.3	27.8	27.3	27.9	28.5	30.5	31.6	29.8	32.2	32.5	33.3
		24	24.4	25.7	25.3	26.8	29.1	31.4	28.7	25.4	23.1	22.3
		25.2	25.1	27.1	25.7	28.5	32.5	34.8	32.4	34.5	35.9	35.6
		24.8	26.9	27.5	26.4	29.3	32	35.1	31.1	34.1	35.1	33.6
		24.2	25.3	27.3	26.7	28.2	30.2	33.5	31.1	33.4	34.7	35.3
		23.9	25.5	26	26.4	27.5	29.5	30.3	29.1	29.9	33	36.2
		25.3	26.5	27	26.8	29.3	33.3	35.3	33	35.4	37.1	37.5
	KAb+HG	28.5	30.6	32.2	35.4	36.6	37.6	38.3	37.5	40.8	41.3	42.2
		24.2	25.1	27.6	33.2	34.8	34.2	34.8	32.7	32.6	33.8	34.2
		24.6	26.8	28	30.2	31.1	31.5	32.6	30.5	33.3	33.9	34.3
		25.4	26.9	28.8	31.3	32.7	32.8	34.5	32.5	34.2	34.9	35.6
		22.1	24	26	28.1	29.6	30.6	30.9	29	29.2	31.3	32.1
		34.7	35.8	37.8	38.9	40.8	41.6	42.7	40.6	44	44.3	44.6
		24	26.3	29	29.1	30.1	30.7	31.9	30	33.4	33.9	34.5
		26.5	27.3	30.2	31.3	33.1	33.7	34.2	33	34.8	34.8	35.8
		27.8	28.3	31.1	33.2	34.8	34.3	34.7	33.7	36.2	36.9	37.3
		25.4	26.2	29.3	30.1	31.6	32.3	33	31.6	35.2	34	34.6
		25.4	26.1	28.4	31.1	32.2	33.1	33.5	32.4	33.5	34.8	35.2
		22.2	24.6	27.3	29.4	30.2	31.2	31.8	30.7	33	33.6	33.9
		26.4	28.4	31.6	33.7	35.3	34.5	34.8	33.4	34.6	34.5	34.9
		28.4	29.2	31.8	31.3	32.9	34.1	37.6	35.2	36.2	36.7	37.3
		24.8	26.1	28.6	33.5	34.7	33.4	34.2	32.6	32.9	33.2	33.8
		27.2	28.9	31.2	32.6	34.6	33	34.2	34.6	35.1	35.3	35.4
		25.5	27.1	29.6	33	33.7	34.7	35.9	34	34.8	35.4	35
		23.2	23.9	24.8	25.6	24.8	30	32.6	34	35.7	36.2	36.3
		23.6	24.1	25.9	26.6	26.7	30.7	31.1	32.8	33.8	35.1	35
		25.7	26.3	26.8	27.4	27.7	28.6	29.2	29	29.5	29.4	31.2

## Sheet: Fig2-blood glucose and ketone
		Control	SD+HG	KD+HG	KAb+HG
	blood glucose	5.2	1	1	1
		5.7	1	1	1.9
		6	1	1.9	2.2
		6	1.1	2	1
		6.2	1	1.8	1.2
		4.8	1.1	1.4	1.1
		Control	SD+HG	KD+HG	KAb+HG
	blood ketone	1	0.9	4.5	2.1
		1.1	1.3	4.3	1.9
		1.1	1.1	3.6	3.2
		0.8	0.6	3	4.4
		0.9	1	2	3.6
		1.2	0.8	3.1	3.8

## Sheet: Fig2-Rotarod Test time
		Control	SD+HG	KD+HG	KAb+HG
	Rotarod Test time	300	300	300	300
		70	200	300	207
		300	145	56	300
		300	300	300	217
		75	300	300	219
		120	300	300	300
		300	300	300	185
		250	210	300	300
		300	204	300	300
		300	110	300	300
		300	300	300	300
		300	108	108	300
		110	147	300	130
		236	280	300	197
		300	300	283	117
		300	300	300	83
		300	176	300	300
		300	60	300	207
		67	65	108	300
		211	68	235	251

## Sheet: Fig2-Grip Test time
		Control	SD+HG	KD+HG	KAb+HG
	Grip Test time(sec)	63	44	20	61
		36	29	29	30
		35	34	32	22
		54	20	54	58
		45	57	32	66
		26	40	42	31
		22	34	24	93
		59	35	26	40
		27	42	31	22
		20	54	90	28
		23	28	82	33
		82	69	79	34

## Sheet: Fig2-EPM
		Control	SD+HG	KD+HG	KAb+HG			Control	SD+HG	KD+HG	KAb+HG			Control	SD+HG	KD+HG	KAb+HG
	distance in the open arms(%)	9.02439	23.1087	25.5036	33.2245		time in the open arms(%)	14.1333	28.3333	35.1333	27.4333		times in the open arms(%)	40.5579	27.8021	52.2574	40.5579
		19.6609	5.05299	19.0192	27.9382			16.3667	6.7	13.9	27.4333			29.2634	6.65901	20.519	39.6694
		18.468	29.6108	14.119	34.5168			22.8	15.2667	22.7333	27.9667			35.5304	21.6245	49.4845	48.2297
		15.509	6.38719	19.281	43.3987			23.0333	11.9	23.1	30.8			47.7861	30.3165	35.7019	43.7534
		8.62267	4.74852	34.5918	29.2095			10.6333	11.2	38.4667	19.7			25.6837	19.9557	34.0258	26.9134
		22.7257	7.94731	20.5538	42.7248			28.8333	11.8	23.5	38.5333			34.4148	53.8974	20.8735	41.2148
		20.0393	20.5128	19.2853	18.6226			21.5667	18.1	33.1667	25.6667			21.1361	24.2336	33.2278	32.0592
		11.826	13.1039	15.8334	36.1322			17.3667	15.8	22.4667	37.6			30.4033	21.7914	30.818	51.3854
		24.3392	8.58028	32.4663	36.9896			11.6333	7.3	31.9	38.8667			21.8854	20.519	66.6271	52.5701
		35.4354	18.1578	28.411	23.6314			15.9333	14.1333	27.9333	26.4333			18.1406	36.3943	34.0258	52.3865
		39.0196	13.3206	31.6449	7.96238			20.5667	15.0333	21.4333	9.83333			42.0382	28.0869	44.9254	37.883
		34.6806	14.4291	25.5036	38.7358			14.3	12.7333	35.1333	31.4			11.5114	18.8656	39.7163	56.4972
		33.076	15.8291	35.8274	6.2362			18.4667	15.6	21.1667	19.4			41.25	13.6137	42.5806	37.9713
		25.6459	16.501	15.899	19.3927			17.4667	16.9	15.1333	36.2667			24.2336	17.9645	39.604	47.4012
		23.1155	11.0517	27.5797	28.7798			11.9667	19.5	37.6	38.2333			26.0022	29.1464	56.4972	39.6694

## Sheet: Fig3-OFT
		Control	SD+HG	KD+HG	KAb+HG			Control	SD+HG	KD+HG	KAb+HG			Control	SD+HG	KD+HG	KAb+HG
	distance in inner area(%)	11.3467	27.3021	21.0133	10.9665		time in inner area(%)	7.73333	16.5	21.2333	5.73333		times in inner area	20	23	47	6
		18.2784	24.5896	23.6988	12.4832			14.5	11.1333	11.4333	7.53333			22	22	22	15
		22.1708	21.6349	26.693	10.1679			8.4	9.8	10.8333	3.8			30	14	18	13
		21.0546	21.9838	32.5364	8.69147			10.6333	12.3	17.0333	2.96667			27	28	33	5
		15.9338	30.3335	25.9481	24.1922			9.46667	16.7333	12.1333	13.9333			20	38	20	22
		35.5381	25.8359	19.8269	30.3655			16.8	14	12.2333	11.1			38	30	25	25
		36.5955	6.96592	27.9878	15.1561			21.0333	4.46667	17.7667	7.3			40	7	38	14
		19.8376	30.2924	29.9355	7.2531			11.0667	20.5	17.7667	3.16667			28	30	35	9
		37.4888	9.49348	32.0202	8.88016			24.7	5.5	16.3667	3.9			41	11	34	13
		35.8371	9.66478	26.0911	17.8012			20.5333	5.3	14.5	6.76667			35	9	23	18
		30.7536	19.7519	27.6919	9.40799			18.0667	8.66667	15.7	3.2			20	31	23	9
		18.4371	15.5201	15.0983	10.9156			18.1333	7.2	8.53333	3.26667			20	26	34	9
		24.9032	31.4803	24.5656	9.71852			10.2	18.9	12.7667	6.36667			30	47	26	13
		26.7411	33.3405	17.2137	21.6382			10.7667	20.1	7.53333	11.2			33	44	23	22
		23.5924	22.77	23.989	17.8241			12.6667	12.9333	15.4333	7.06667			23	29	29	18

## Sheet: Fig3-TH,TPH2
				Control	SD+HG	KD+HG	KAb+HG			Control	SD+HG	KD+HG	KAb+HG
			TH/β-actin	1.06285	0.599506	0.628983	0.534287		TPH2/β-actin	0.974189	0.538165	0.634378	0.650201
				0.937151	0.737027	0.713642	0.489997			1.15381	1.18814	1.32163	0.558978
				0.930959	0.438975	0.480741	0.383543			1	1.11559	0.859288	0.818261
				1.06904	0.549499	0.594999	0.977452			1	1.1826	1.24806	0.371431
				1	0.971771	1.08967	0.708987			1	0.756738	1.11403	0.597961
		actin——B	actin——C	actin——2#	actin——1#	actin——3
		10244.6	15935	4325.91	5062.11	5542.38
		14699.5	18160.2	5990.84	3921.11	4419.08
		13852.4	14744	6237.55	3121.41	4148.13
		16420.1	16467.5	9860.92	5994.77	6276.45
		TH	TH						TH
	Control	11586.3	8897.17	4313.86	3245.6	6080.3			1.13097	0.997213	0.55834	0.641155	1.09706
	SD+HG	9377.23	7971.88	4698.4	2154.65	4711.12			0.637929	0.784263	0.438975	0.549499	1.06609
	KD+HG	9271.35	7088.05	4736.67	1857.23	4958.81			0.669294	0.75938	0.480741	0.594999	1.19543
	KAb+HG	9335.3	6315.98	5141.5	5859.6	4881.81			0.568529	0.521401	0.383543	0.977452	0.777798
		TPH2							TPH2
	Control	9908.2	13795.2	4955.29	6510.95	8402.08			0.967164	1.14549	0.865713	1.28621	1.51597
	SD+HG	7853.71	17538.7	7066.61	5964.3	5069.54			0.534285	1.17957	0.965776	1.52107	1.14719
	KD+HG	8724.3	10968	8184.27	5010.71	7005.54			0.629803	1.3121	0.743897	1.60527	1.68884
	KAb+HG	10599.4	11665.2	5472.3	2863.93	5689.54			0.645513	0.554948	0.708379	0.477739	0.90649

## Sheet: Fig4-MWM
		Control										SD+HG										KD+HG										KAb+HG
	1d	44	28.5	58.75	43.75	33.25	48.75	38.5	48	47.5	45.75	34.25	29.75	38.25	52	60	47.25	43.25	47.5	42.5	48.25	31	42.25	19.75	29.5	43	46.5	45.75	33	31	27.75	34.5	36.5	39	26.75	35	55.75	35.5	49.75	32.25	43
	2d	33	16	23.75	17	36.5	44.5	31.25	18.75	14.75	40.5	33.25	26.5	31.25	27.75	46.75	21.25	30.25	32.25	40.25	33.25	28.5	32.5	13.25	13	24.5	28	25	18.5	13.75	16.5	20.5	15.5	26	40.25	32.5	18.5	18.75	57.25	56.25	17.25
	3d	5	30	26.75	10.75	33	20.25	19.5	21.75	19	11.75	17.5	23.5	22.5	12.75	43.75	19.5	26.75	58.75	18.5	15.5	9.25	24.25	10.5	12.5	23	21.25	21.75	9.25	13.75	19	13	14.5	7.75	23.5	37.5	35	3.75	13.5	52.75	32.5
	4d	4.75	10.25	18.75	13.5	20.25	3.5	9.75	4.75	10	12.5	27	17.25	20.25	15.25	42.5	16	11.75	23.75	18	18.25	7.25	9	9.75	7	11.75	10.25	10.25	11.5	7.25	8.5	17.5	9.75	37	17.25	14.5	23.25	8.75	30.5	26	15.5
	crossing times	Control	SD+HG	KD+HG	KAb+HG
		8	2	8	4
		8	6	6	6
		4	4	5	6
		7	3	4	3
		8	7	7	3
		6	2	7	6
		5	3	5	2
		5	5	4	5
		4	5	7	4
		9	4	8	4
	time in target quadrant	Control	SD+HG	KD+HG	KAb+HG
		47.8333	35.8333	28.6667	27.1667
		39.8333	40.8333	30.6667	36.3333
		36	21.3333	30.5	33.3333
		45.8333	29.8333	33.6667	44.3333
		37.3333	20.5	37	30.8333
		47.1667	32.8333	25.1667	30.3333
		24.8333	36.3333	29.6667	32.6667
		30.5	37.5	30	31
		28.6667	31.1667	40	27
		53.6667	39.5	48.5	36.6667

## Sheet: Fig4-Golgi
			Control	SD+HG	KD+HG	KAb+HG			Control					SD+HG					KD+HG					KAb+HG
		Total spine density	1.33333	1.02405	1.21905	1.06217		Mushroom	41.3812	41.9657	43.0505	41.9003	42.1911	20.907	20.444	17.781	15.5721	16.8581	33.4485	32.1462	30.1467	20.9291	21.2825	14.1827	19.9625	18.3244	13.818	15.982
			1.30909	0.88939	1.16923	1.02583		Stubby	30.8973	23.6988	16.5026	26.7592	27.9429	56.5865	48.676	58.2766	56.7	61.6373	37.8059	47.9684	36.1425	56.2406	47.3837	55.6583	58.6672	49.5149	58.7449	53.9469
			1.2	1.11404	1.30909	1.2913		Thin	18.3449	20.6934	31.436	19.4232	20.4462	10.1284	14.5464	9.45645	14.9669	9.28096	19.5428	11.442	20.4915	10.5499	17.7165	16.3279	14.0372	17.1716	14.3615	13.2749
			1.15556	1.5725	1.35758	0.935126		Others	9.3766	12.5815	9.01086	11.9174	9.41975	12.3781	15.188	14.486	12.761	12.2237	9.20285	8.25436	13.2194	12.2804	13.6174	13.8311	9.68692	14.989	13.0757	16.7961
			1.49333	1.21386	1.37143	0.806769
			0.980645	1.13184	0.834783	1.08927
			1.27179	1.41667	1.28	1.06343
			0.933333	1.24667	1.01818	1.00182
			1.82069	0.964219	0.979592	0.981118
			1.07692	1.46667	1.43448	0.811321
			1.44516	1.08581	1.25523	0.923178
			1.0449	1.37328	1.49701	1.40998
			1.28525	1.37653	0.745614	1.06343
			1.16129	1.12979	0.851735	1.38462
			1.34054	0.882075	0.980926	1.10577
			1.14667	1.13742	1.13895	1.28346
			0.921212	0.921449	1.16719	0.810277
			1.056	0.831111	1.72662	1.0867
			1.2878	1.69068	0.934844	0.913093
			1.09474	1.63356	1.49864	1.40524

[truncated: 6 more sheets: Fig5-TEM, Fig5-SPN,SYP,PSD95, Figure.6, Figure.7, Figure.8, Fig9]
