# Supplementary figures and images for: Ketogenic diet attenuates cognitive dysfunctions induced by hypoglycemia via inhibiting endoplasmic reticulum stress-dependent pathways
Source: Royal Society of Chemistry journal article supplement (doi:10.1039/d3fo04007k), 2023-12-21

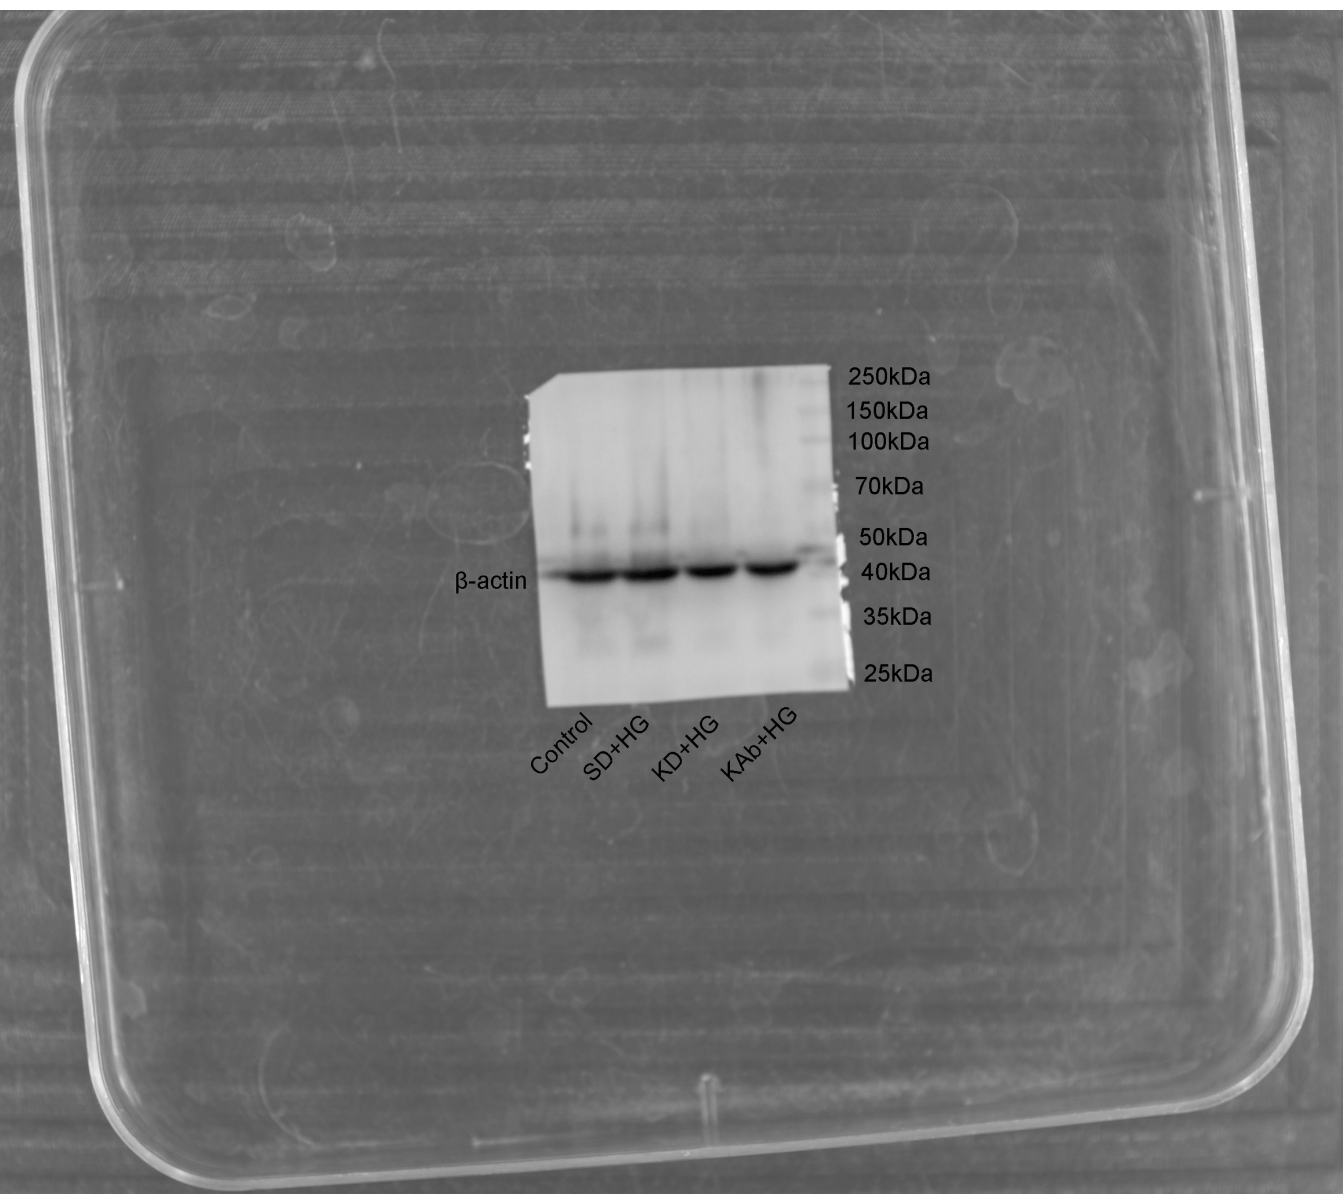

Supplement: d3fo04007k1.pdf [file d3fo04007k1.pdf]

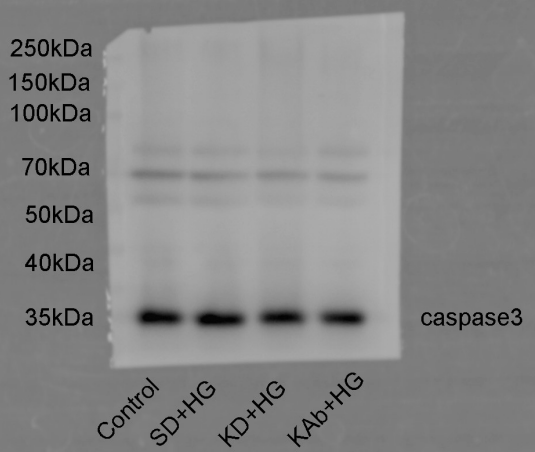

Supplement: d3fo04007k10.pdf [file d3fo04007k10.pdf]

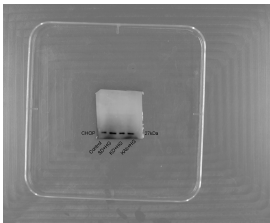

Supplement: d3fo04007k11.pdf [file d3fo04007k11.pdf]

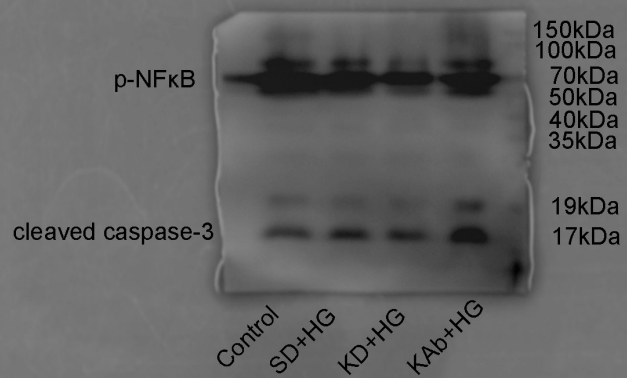

Supplement: d3fo04007k12.pdf [file d3fo04007k12.pdf]

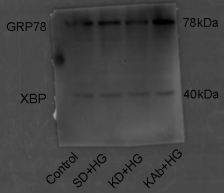

Supplement: d3fo04007k13.pdf [file d3fo04007k13.pdf]

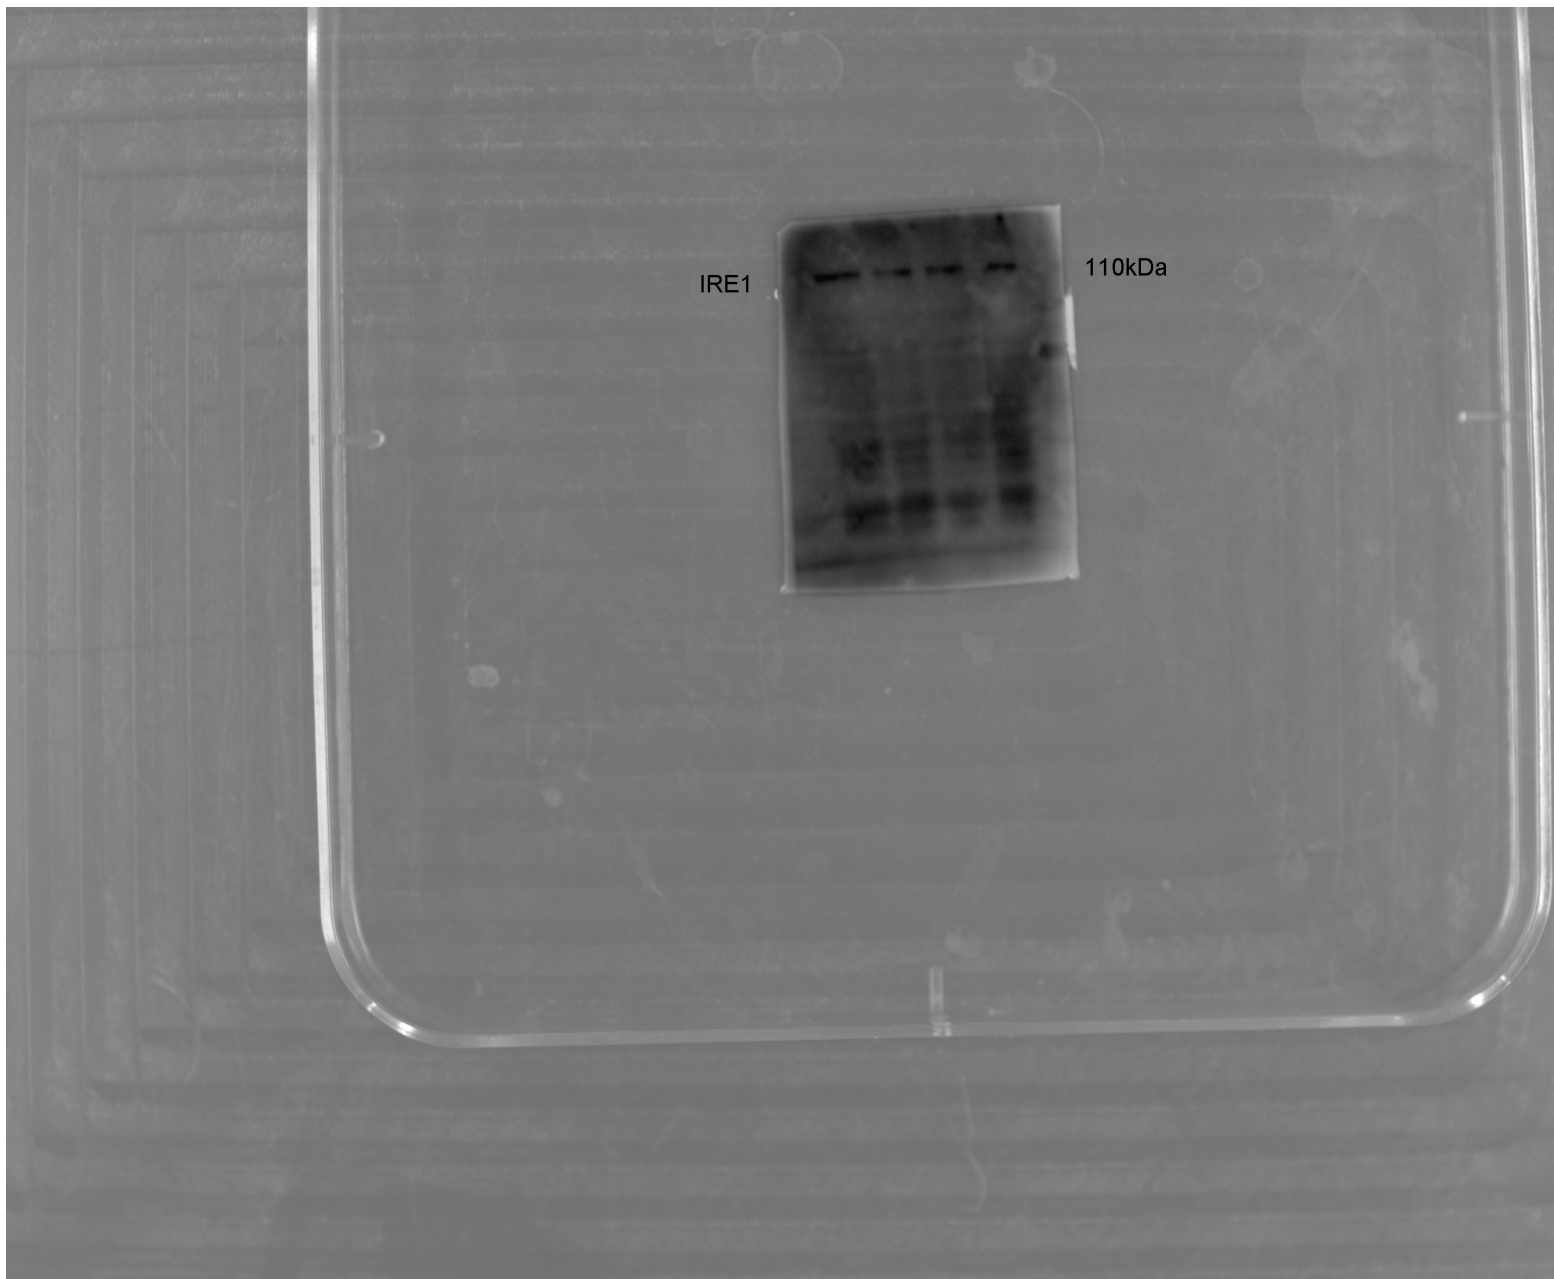

Supplement: d3fo04007k14.pdf [file d3fo04007k14.pdf]

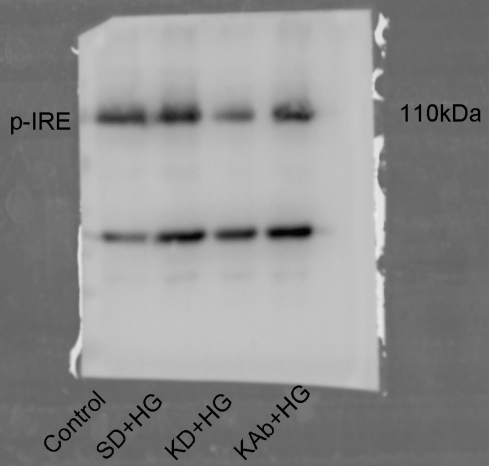

Supplement: d3fo04007k15.pdf [file d3fo04007k15.pdf]

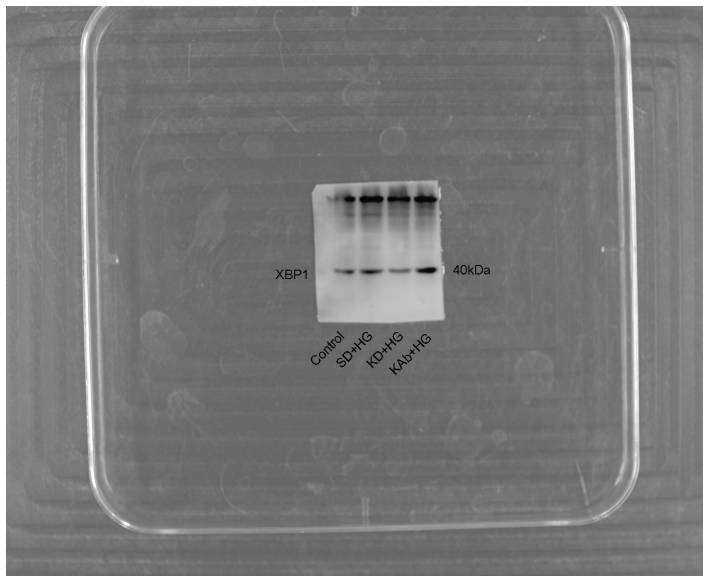

Supplement: d3fo04007k16.pdf [file d3fo04007k16.pdf]

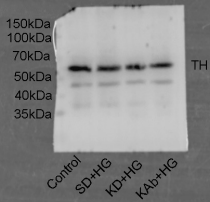

Supplement: d3fo04007k2.pdf [file d3fo04007k2.pdf]

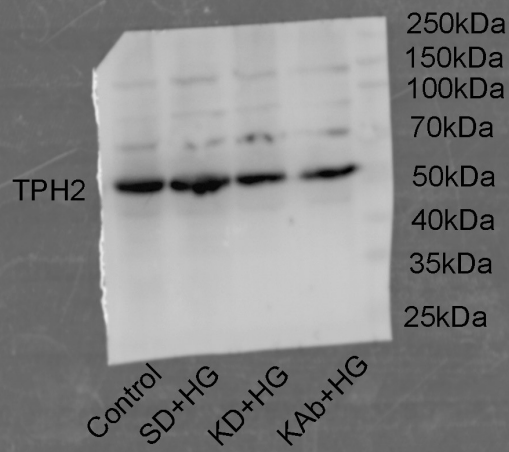

Supplement: d3fo04007k3.pdf [file d3fo04007k3.pdf]

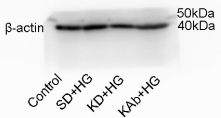

Supplement: d3fo04007k4.pdf [file d3fo04007k4.pdf]

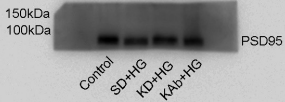

Supplement: d3fo04007k5.pdf [file d3fo04007k5.pdf]

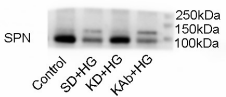

Supplement: d3fo04007k6.pdf [file d3fo04007k6.pdf]

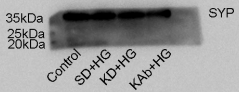

Supplement: d3fo04007k7.pdf [file d3fo04007k7.pdf]

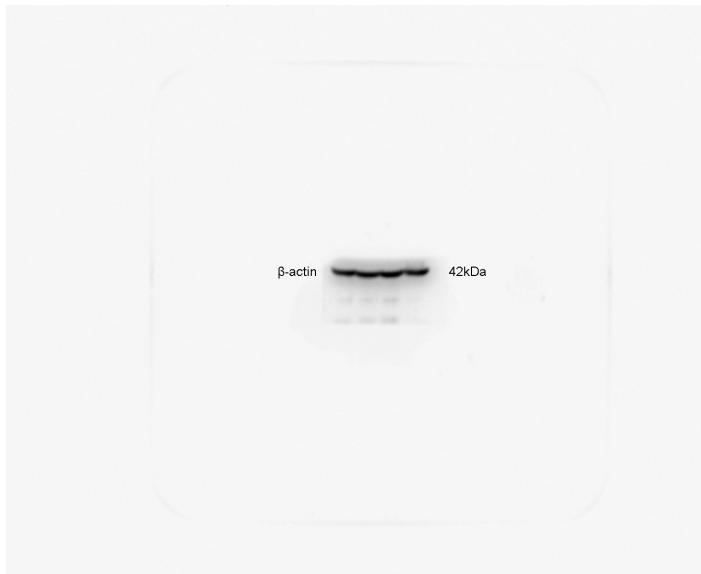

Supplement: d3fo04007k8.pdf [file d3fo04007k8.pdf]

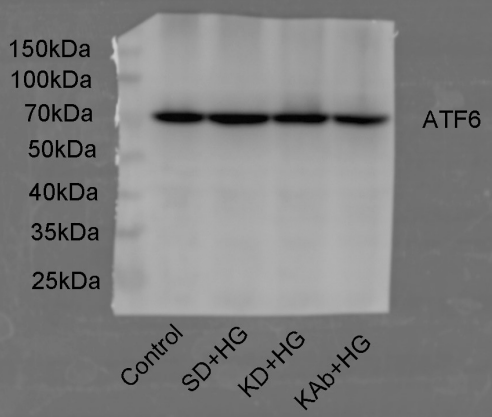

Supplement: d3fo04007k9.pdf [file d3fo04007k9.pdf]
